# Supplementary figures and images for: Phenolic content, antioxidant and antiproliferative activities of six varieties of white sesame seeds (Sesamum indicum L.)
Source: Royal Society of Chemistry journal article supplement (doi:10.1039/c6ra26596k), 2017-01-01

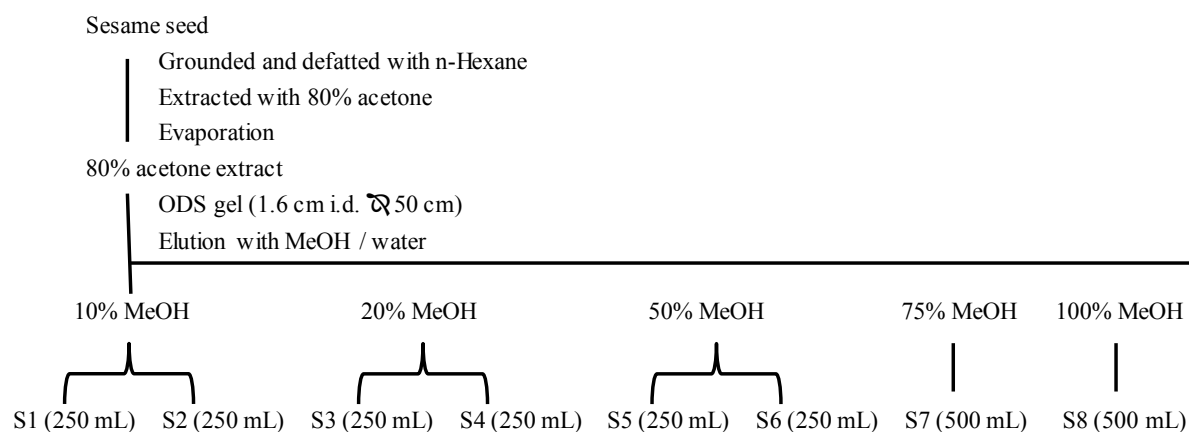

**Supplementary data 1:** Separation of crude extract by column chromatography.

Supplement: c6ra26596k1.pdf [file c6ra26596k1.pdf]
